# Supplementary material for: Lateral/caudal ganglionic eminence makes limited contribution to cortical oligodendrocytes
Source: eLife. 2024 Sep 11;13:RP94317. doi: 10.7554/eLife.94317 (PMC11390106; doi:10.7554/eLife.94317)
Supplement: Figure 1—source data 1. [file elife-94317-fig1-data1.xlsx]

## Sheet: Fig1F
NCx							Cortex
	animal1	animal2	animal3	Mean	SEM			animal1	animal2	animal3	anima4
GFP+	1873	2180	1877				tdT	208	194	138	232	772
CC1+	2087	2308	1976				OLIG2	1	1	0	2	4
								animal1	animal2	animal3	anima4
							tdT	98	184	129	153	564
							SOX10	0	1	0	0	1
