# Supplementary material for: Lateral/caudal ganglionic eminence makes limited contribution to cortical oligodendrocytes
Source: eLife. 2024 Sep 11;13:RP94317. doi: 10.7554/eLife.94317 (PMC11390106; doi:10.7554/eLife.94317)
Supplement: Figure 3—figure supplement 1—source data 1. [file elife-94317-fig3-figsupp1-data1.xlsx]

## Sheet: Sheet1
	animal1	animal2	animal3	animal4	animal5
GSX2+	151	131	110	169	94
GFP+GSX2+	151	130	110	168	94
