# Supplementary material for: Lateral/caudal ganglionic eminence makes limited contribution to cortical oligodendrocytes
Source: eLife. 2024 Sep 11;13:RP94317. doi: 10.7554/eLife.94317 (PMC11390106; doi:10.7554/eLife.94317)
Supplement: Figure 3—source data 1. [file elife-94317-fig3-data1.xlsx]

## Sheet: Sheet1
P10
animal	1	2	3	4	5	6	Sum
sox10+GFP-	8	4	12	8	5	12	49
sox10+	243	252	269	263	276	288	1591
pdgfra+GFP-	6	2	4	5	3	5	25
pdgfra+	181	190	173	218	172	192	1126
P0
animal	1	2	3	4	5	6
sox10+GFP-	4	4	5	5	4	5	27
sox10+	164	181	208	205	175	203	1136
pdgfra+GFP-	3	2	2	3	3	3	16
pdgfra+	120	133	147	164	147	154	865
