# Supplementary material for: Lateral/caudal ganglionic eminence makes limited contribution to cortical oligodendrocytes
Source: eLife. 2024 Sep 11;13:RP94317. doi: 10.7554/eLife.94317 (PMC11390106; doi:10.7554/eLife.94317)
Supplement: Figure 4—source data 1. [file elife-94317-fig4-data1.xlsx]

## Sheet: Sheet1
E14.5
Control	animal1	animal2	animal3	animal4	animal5	animal6
SOX10	23	27	15	18	12	19
PDGFRA	16	20	12	14	16	12
Olig2-NCKO	animal1	animal2	animal3	animal4	animal5	animal6
SOX10	3	2	3	2	3	0
PDGFRA	2	0	1	2	0	3
E16.5
Control	animal1	animal2	animal3	animal4	animal5
SOX10	20	36	26	20	28
PDGFRA	37	21	31	16	20
Olig2-NCKO	animal1	animal2	animal3	animal4	animal5
SOX10	6	9	10	4	11
PDGFRA	5	7	9	3	9
