# Supplementary material for: Lateral/caudal ganglionic eminence makes limited contribution to cortical oligodendrocytes
Source: eLife journal article supplement (doi:10.7554/elife.94317), 2024-03-05
Supplement: figures [file elife-94317-figures-v1.pdf]

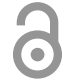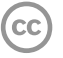

---

## Figures and figure supplements

Lateral/caudal ganglionic eminence makes limited contribution to cortical oligodendrocytes

**Jialin Li, Feihong Yang and Yu Tian et al.**

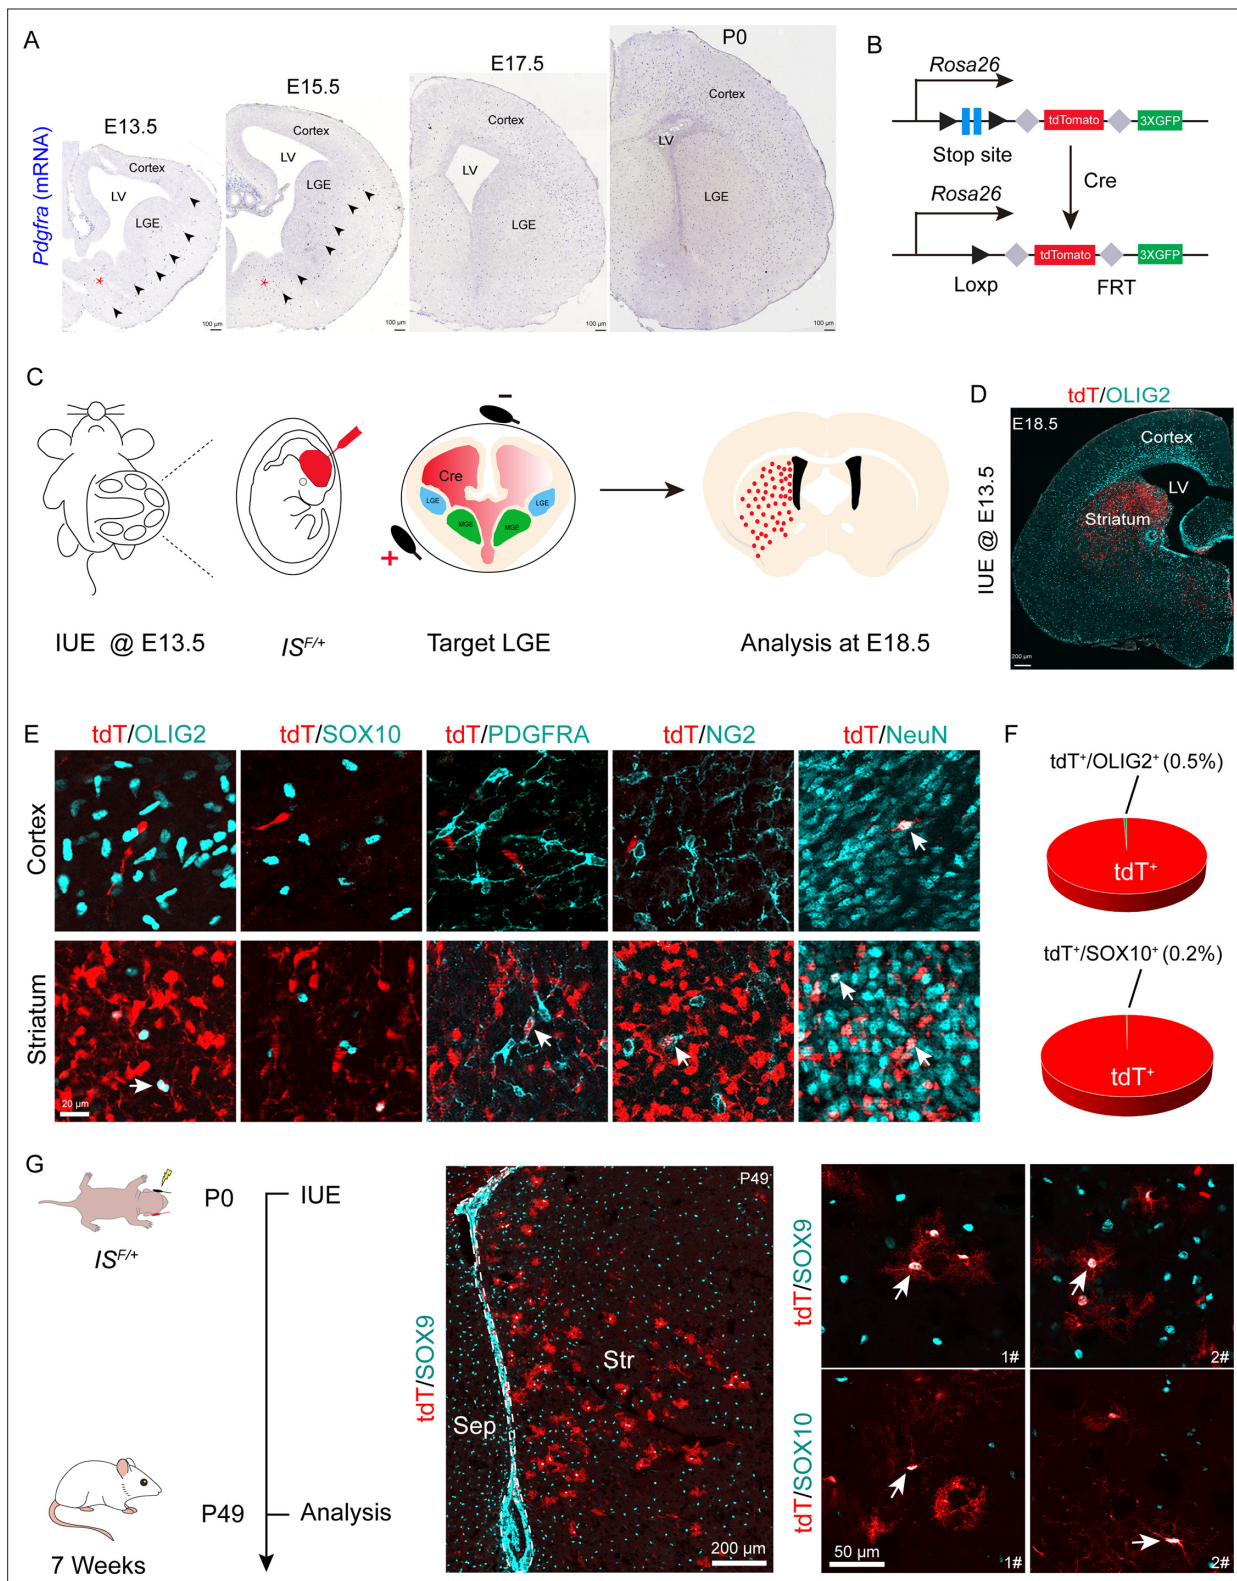

**Figure 1.** Fate mapping of lateral ganglionic eminence (LGE)-derived oligodendrocyte precursor cells (OPCs) by combining in utero electroporation (IUE) with a Cre recombinase-dependent IS reporter. **(A)** In situ hybridization showing *Pdgfra* expression from embryonic day 13.5 (E13.5) to postnatal day 0 (P0). Arrowheads indicated the *Pdgfra*<sup>+</sup> cell migration stream from the medial ganglionic eminence (MGE)/anterior entopeduncular area (AEP) to the cortex. **(B)** Scheme of the IS reporter lines. **(C)** Experimental schedule to trace LGE-derived OPCs. **(D)** Representative coronal sections showing the distribution of tdT<sup>+</sup> cells. **(E)** tdT<sup>+</sup> cells expressed NeuN but not OLIG2, SOX10, PDGFRA, or NG2 in the cortex. In contrast, the tdT<sup>+</sup> cells expressed all of these markers in the striatum. **(F)** Pie charts showing the percentage of tdT<sup>+</sup> cells expressing OLIG2 (0.5%) and SOX10 (0.2%) in the cortex. **(G)** Fate mapping of LGE-derived OPCs. IUE was performed at P0 in *ISF*<sup>+/+</sup> mice. Analysis was performed at P49 (7 weeks). Staining for tdT/SOX9 and tdT/SOX10 is shown in the striatum (Str) and septum (Sep). Scale bars: 200 μm and 50 μm.

Figure 1 continued on next page

*Figure 1 continued*

these markers (OLIG2, SOX10, PDGFRA, NG2, and NeuN) in the striatum. **(F)** The ratio of the OLIG2<sup>+</sup> and SOX10<sup>+</sup> cells of the electroporated cells in the cortex. N=4 mice per group. **(G)** Fate mapping of LGE-derived cells at P0. tdT<sup>+</sup> cells expressed SOX10 and SOX9 in the striatum at P49.

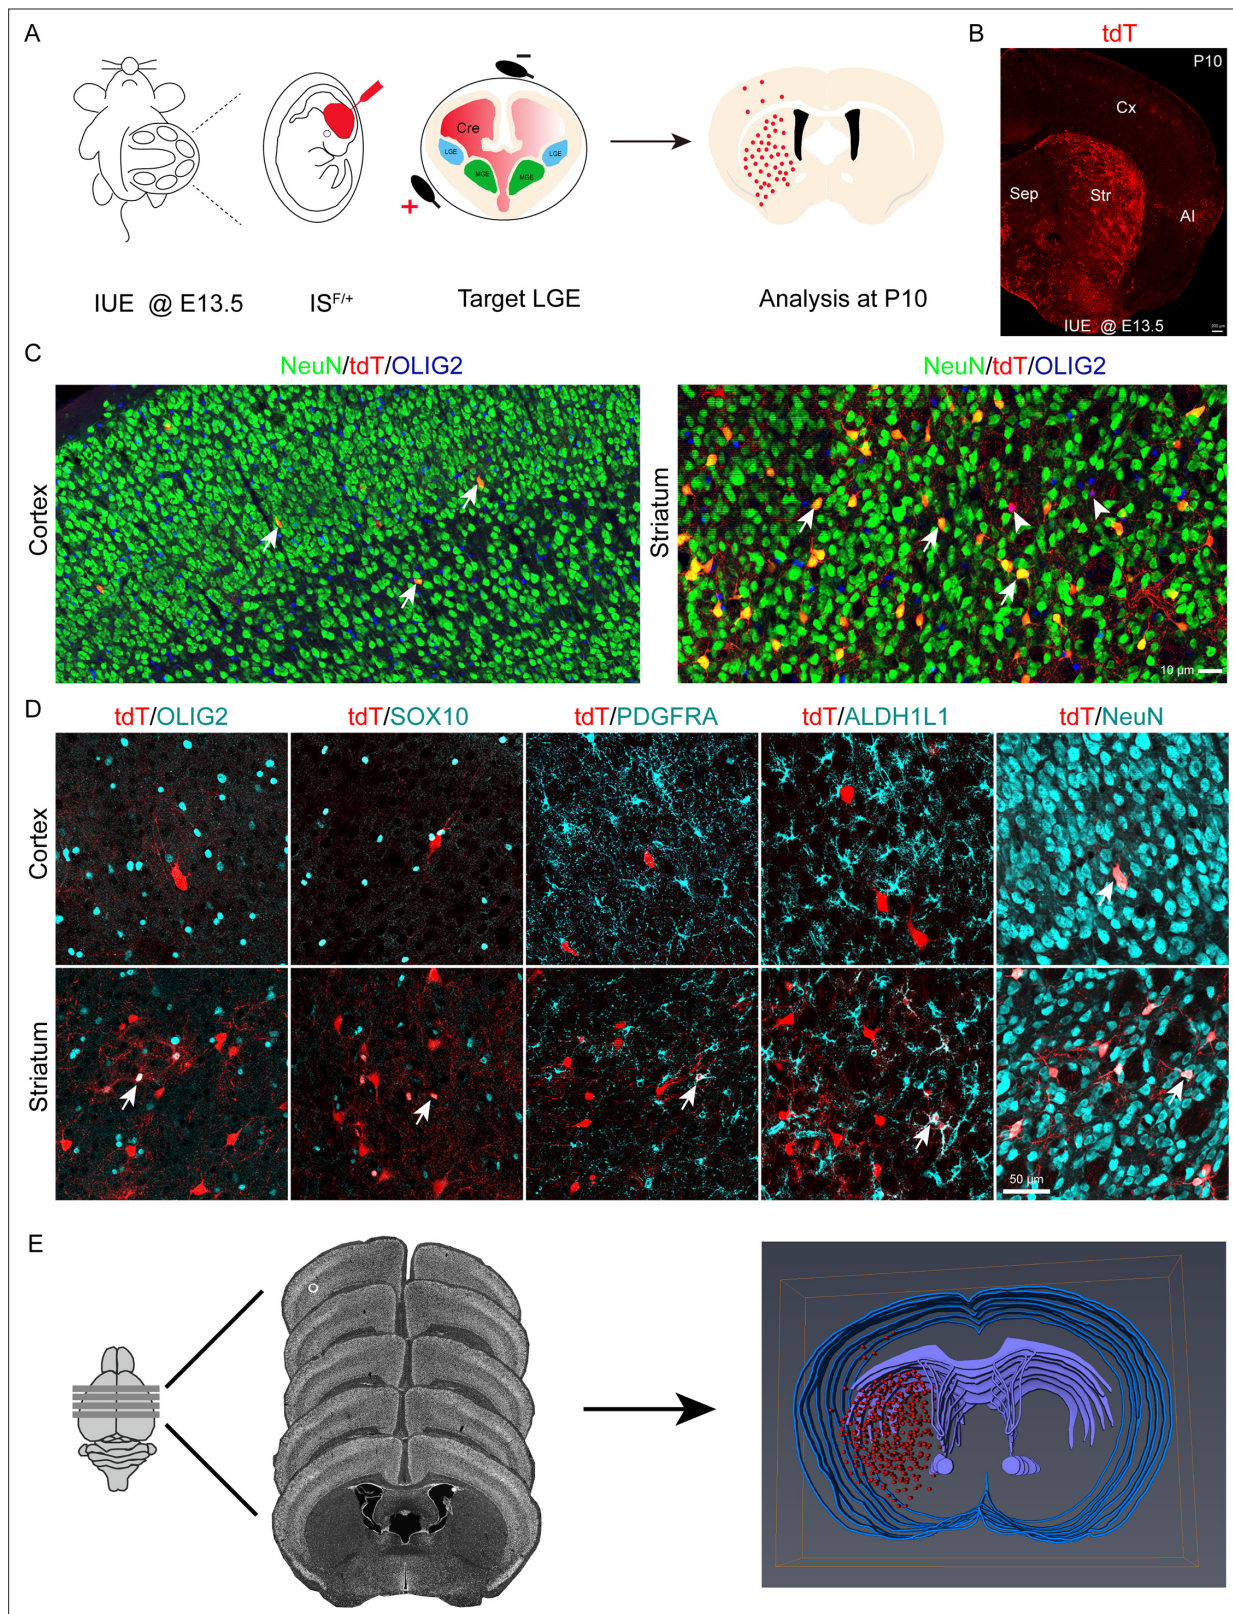

**Figure 1—figure supplement 1.** Lineage tracing of lateral ganglionic eminence (LGE)-derived oligodendrocyte precursor cells (OPCs) by combining in utero electroporation (IUE) with a Cre recombinase-dependent IS reporter. **(A)** Experimental schedule for fate mapping of LGE-derived OPCs.

**(B)** Representative coronal sections showing the distribution of the tdT<sup>+</sup> cells at P10. **(C)** Nearly all tdT<sup>+</sup> cells expressed NeuN but not OLIG2 in the cortex. tdT<sup>+</sup> cells expressed NeuN and OLIG2 in the striatum.

**(D)** tdT<sup>+</sup> cells did not express OLIG2, SOX10, PDGFRA, or ALDH1L1. Instead, they

*Figure 1—figure supplement 1 continued on next page*

*Figure 1—figure supplement 1 continued*

expressed NeuN in the cortex. In sharp contrast, tdT<sup>+</sup> cells in the striatum expressed OLIG2, SOX10, PDGFRA, ALDH1L1, and NeuN at P10. **(E)** 3D reconstruction of consecutive brain sections demonstrated that the traced cells were mainly located in the striatum. N=4 mice per group.

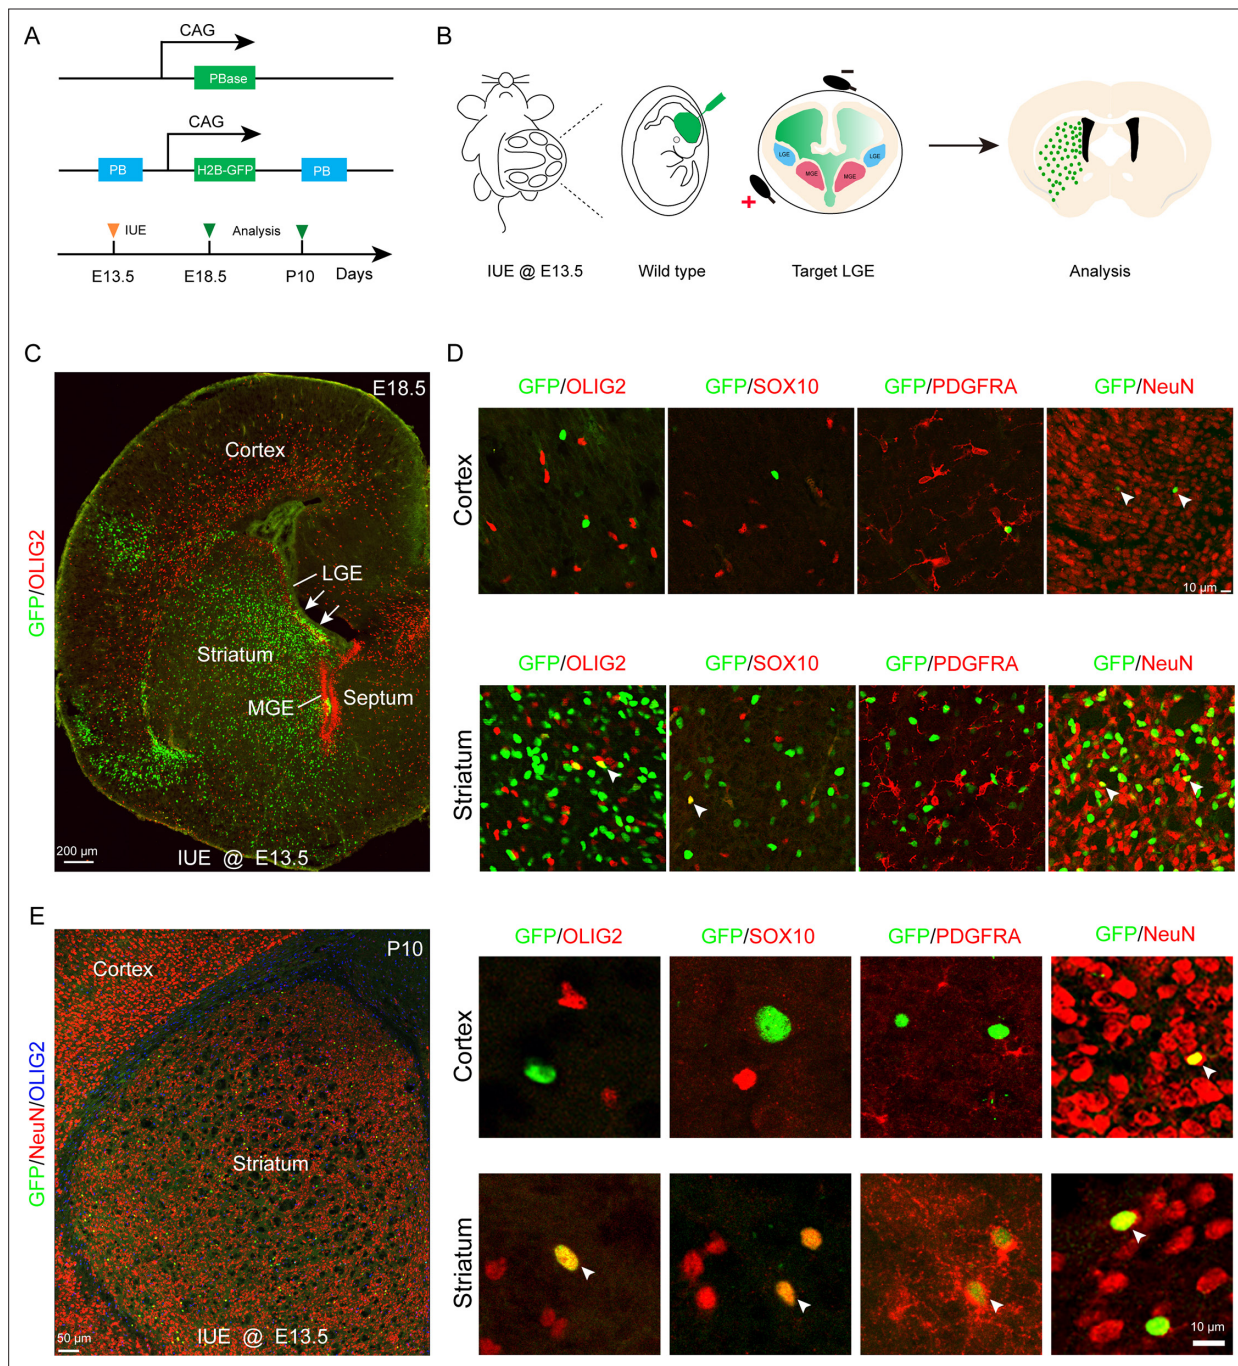

**Figure 2.** Fate mapping of lateral ganglionic eminence (LGE)-derived oligodendrocyte precursor cells (OPCs) by combining in utero electroporation (IUE) with PiggyBac transposon system. **(A)** Schematic of the PiggyBac transposon reporter system used in this study. **(B)** The experimental workflow. **(C)** Representative coronal sections showing the distribution of GFP<sup>+</sup> cells at embryonic day 18.5 (E18.5). **(D)** GFP<sup>+</sup> cells expressed NeuN but not glial cell markers, such as OLIG2, SOX10, and PDGFRA in the cortex. However, GFP<sup>+</sup> cells expressed NeuN, OLIG2, SOX10, and PDGFRA in the striatum. **(E)** GFP<sup>+</sup> cells expressed NeuN but not glial cell markers, such as OLIG2, SOX10, and PDGFRA in the cortex and GFP<sup>+</sup> cells expressed NeuN, OLIG2, SOX10, and PDGFRA in the striatum at postnatal day 10 (P10). N=4 per group.

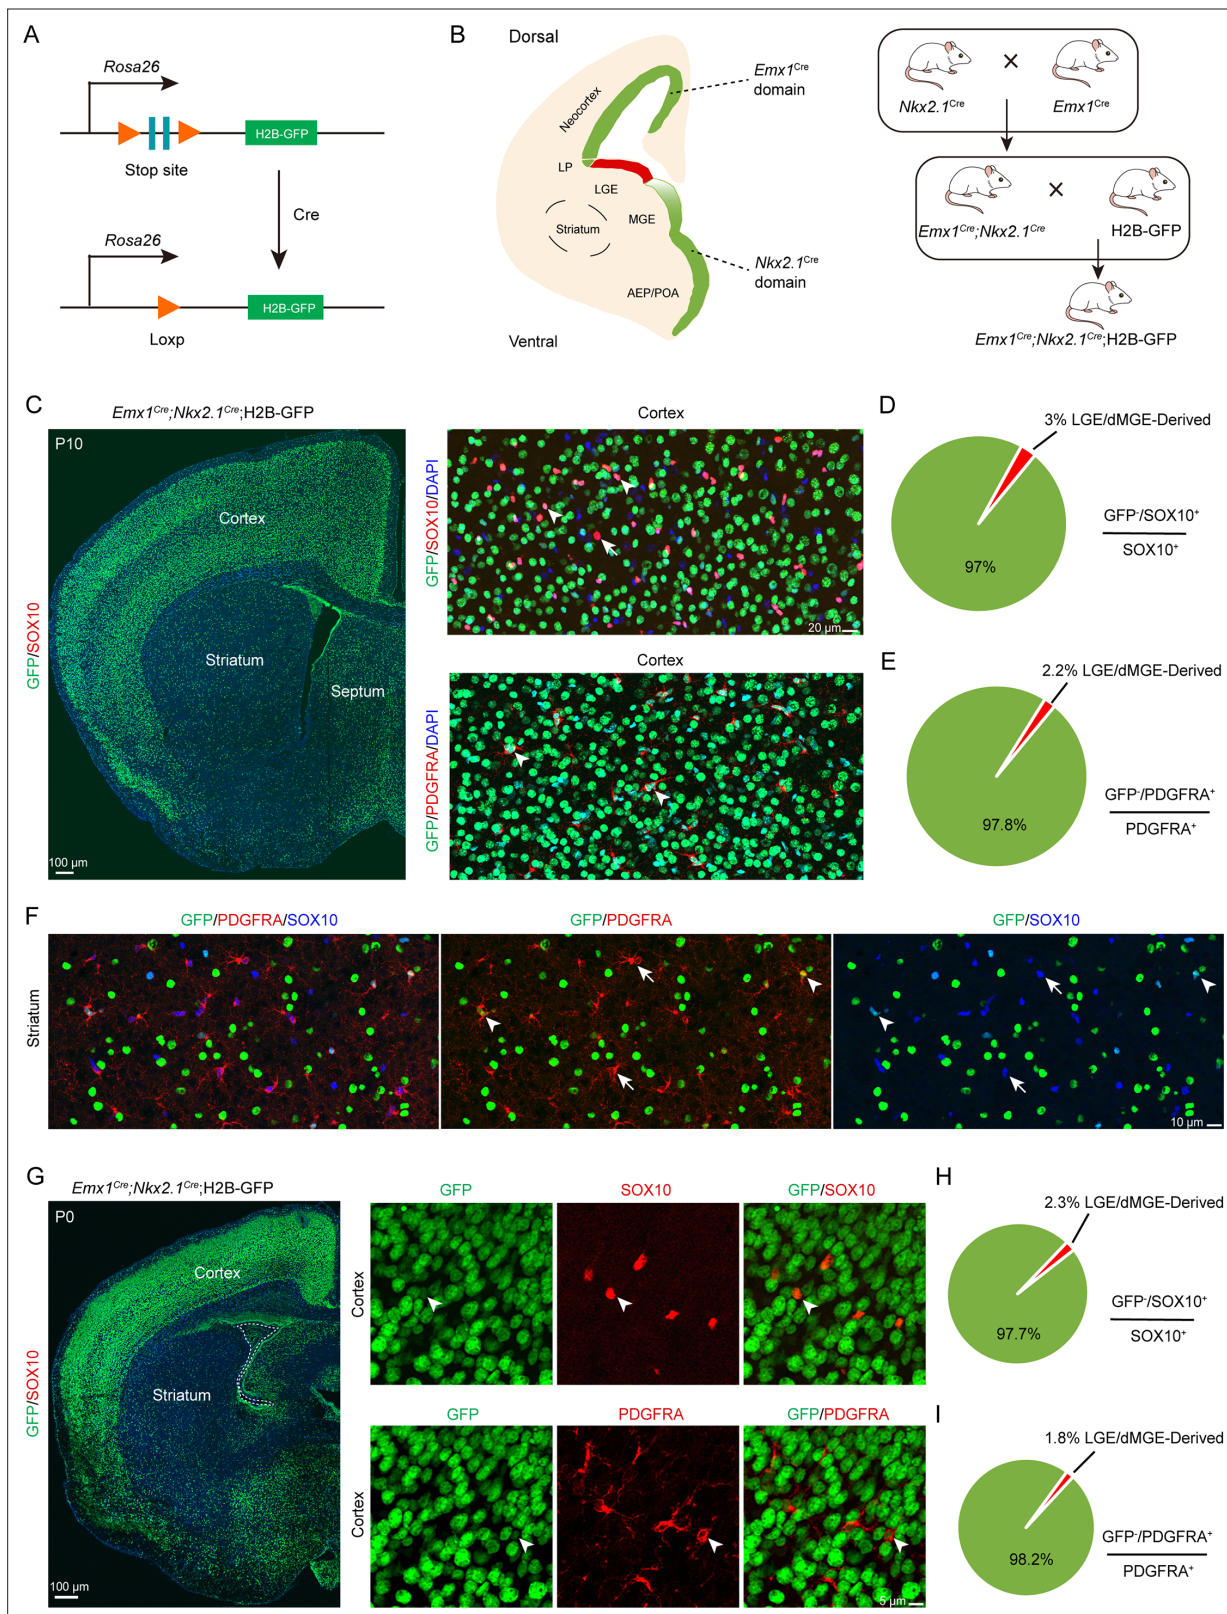

**Figure 3.** An exclusion strategy showed that lateral/caudal ganglionic eminence (LGE/CGE) contribution to cortical oligodendrocyte precursor cells (OPCs) is minimal. **(A)** Scheme of the H2B-GFP reporter lines. **(B)** Experimental design of the exclusion strategy to trace the lineage of LGE radial glial cells (RGCs). **(C)** Representative coronal sections showing the traced cells in the forebrain. The majority of SOX10- and PDGFRA-positive cells were GFP<sup>+</sup> cells in the cortex at postnatal day 10 (P10). **(D–E)** The pie chart shows that the percentage of LGE/dMGE-derived cortical OPCs was approximately 3%.

Figure 3 continued on next page

*Figure 3 continued*

N=6 mice per group. **(F)** Many GFP<sup>+</sup> cells expressed SOX10 and PDGFRA in the striatum at P10. **(G)** Nearly all SOX10 and PDGFRA expressed GFP in the cortex at P0. **(H-I)** The pie chart shows that the percentage of LGE/dMGE-derived cortical OPCs was less than 3%. N=6 mice per group.



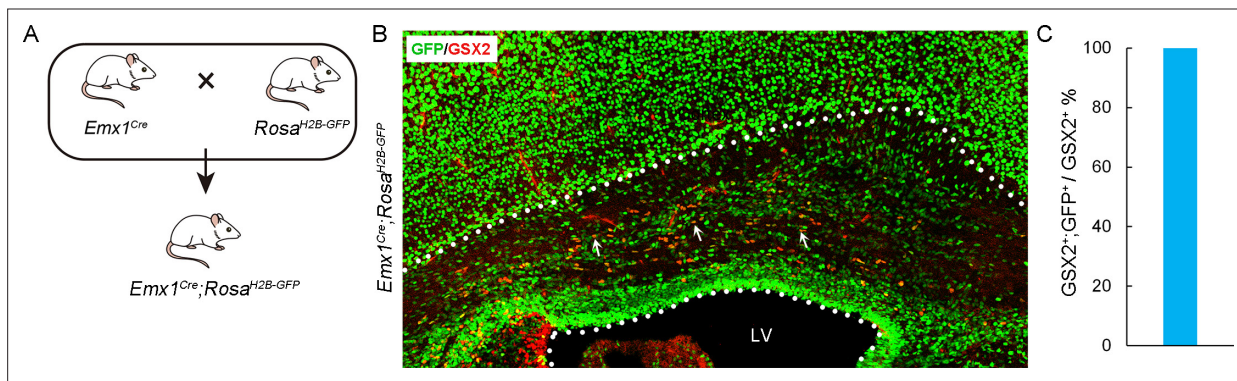

**Figure 3—figure supplement 1.** Lineage tracing of *Emx1<sup>Cre</sup>* derived cortical cells. **(A)** Experimental design for the generation of *Emx1<sup>Cre</sup>*; H2B-GFP mice. **(B)** Double immunostaining of GSX2 with GFP in the *Emx1<sup>Cre</sup>*; H2B-GFP cortex at postnatal day 0 (P0). **(C)** The statistics show that nearly all GSX2<sup>+</sup> cells co-labeled with GFP in the cortical SVZ. N=4 per group.

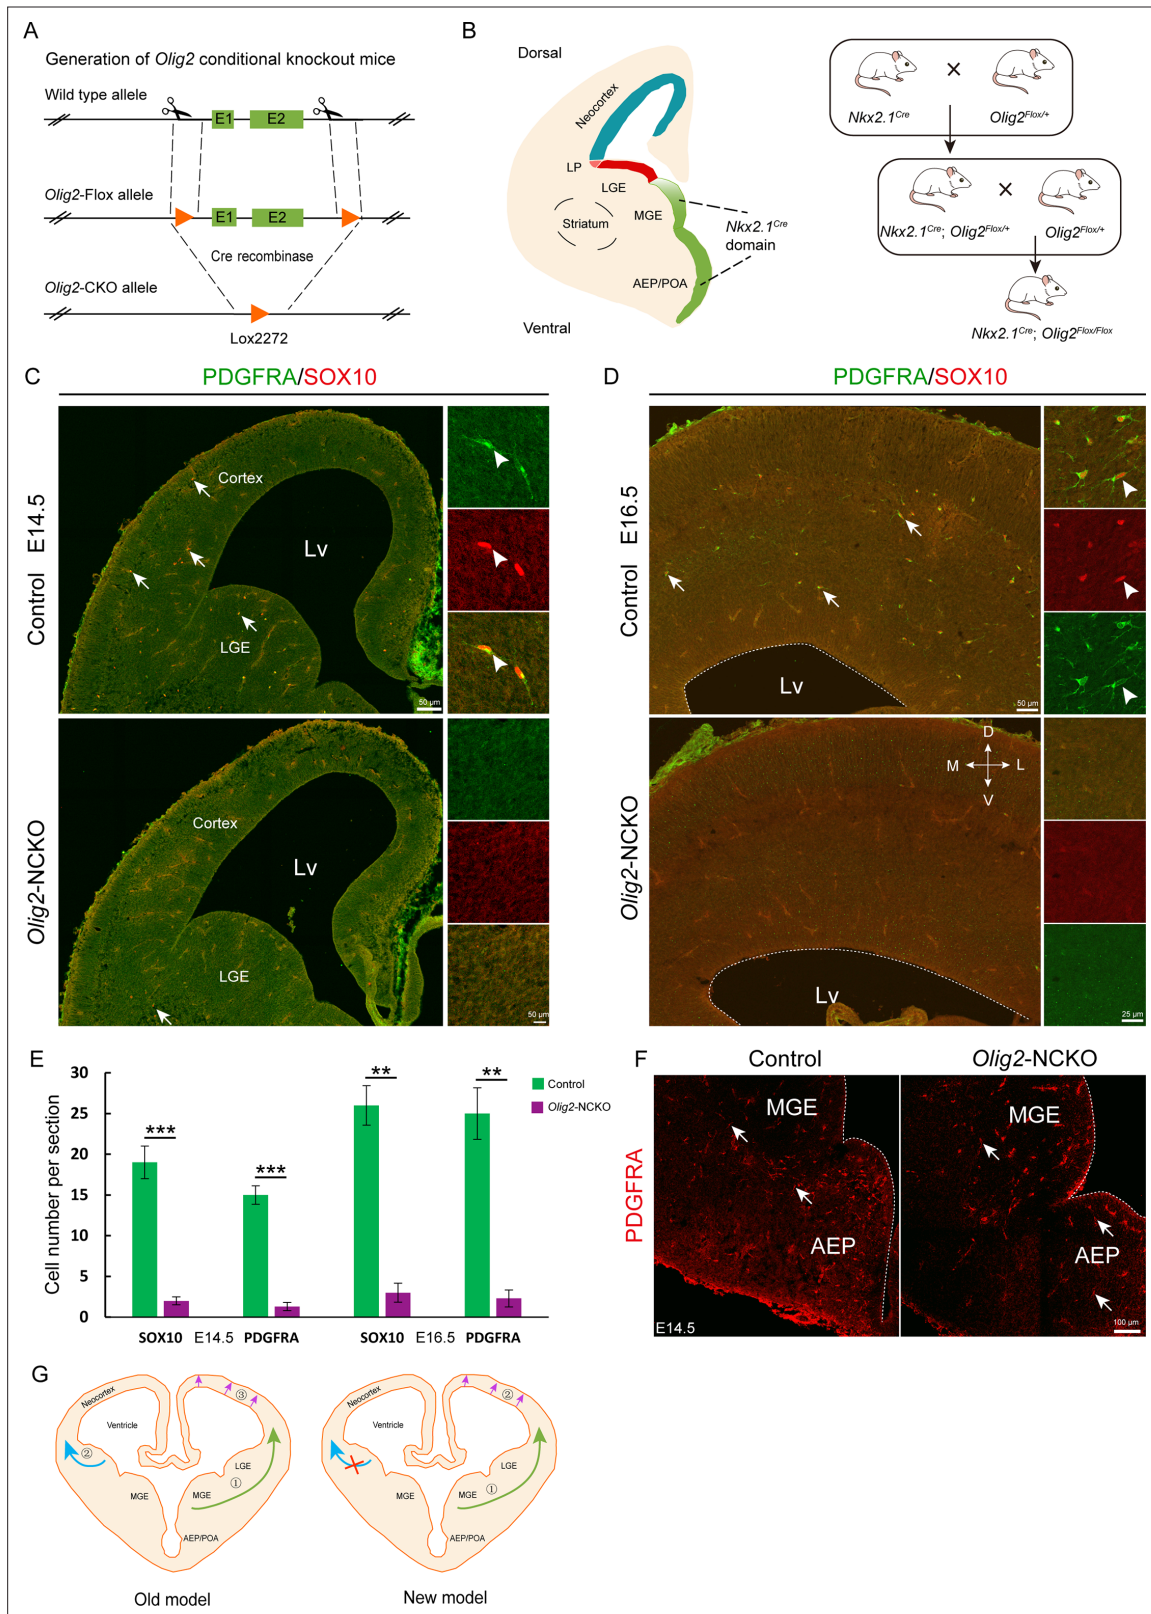

**Figure 4.** The medial ganglionic eminence (MGE) may be the sole ventral source of cortical oligodendrocyte precursor cells (OPCs). **(A)** The CRISPR/Cas9 technique was used to generate an *Olig2* conditional knockout allele. **(B)** Experimental design for the generation of *Olig2*-NCKO mice. **(C–D)** The expression of *SOX10* and *PDGFRA* was significantly reduced in the cortex of *Olig2*-NCKO mice compared with that of control mice. **(E)** The number of *SOX10*- and *PDGFRA*-positive cells was significantly reduced in *Olig2*-NCKO mice compared with control mice. Student's t-test, \*\*p < .01, \*\*\*p < .001, Figure 4 continued on next page

Figure 4 continued

N≥5 mice per group, mean ± SEM. (F) Few PDGFRA-positive cells were detected in the MGE/anterior entopeduncular area (AEP) of the *Olig2*-NCKO mice. (G) A new model of the developmental origins of cortical OPCs.
